# Supplementary material for: 18F-fluoromisonidazole PET and Activity of Neoadjuvant Nintedanib in Early HER2-Negative Breast Cancer: A Window-of-Opportunity Randomized Trial
Source: Oxford University Press journal article supplement (doi:10.1158/1078-0432.ccr-16-0738), 2016-09-01
Supplement: 10780432ccr160738-sup-164085_2_supp_3580143_337kcp.docx [file 10780432ccr160738-sup-164085_2_supp_3580143_337kcp.docx]

**Supplementary Table 1: SUV variation in muscle tissue along the WoO in patients with serial PET Scans.**

| **Patient ID** | **SUV Spinalis Thoracis pre-WoO** | **SUV Spinalis Thoracis post-WoO** | **Variation (absolute)** | **Variation (%)** |
| --- | --- | --- | --- | --- |
| **2005** | 1.1 | 1.1 | 0 | 0% |
| **2052** | 1.1 | 1.1 | 0 | 0% |
| **2054** | 1.1 | 1.1 | 0 | 0% |
| **2057** | 0.8 | 1.1 | 0.3 | 37.5% |
| **2059** | 1.1 | 1.1 | 0 | 0% |
| **2061** | 1.1 | 1.1 | 0 | 0% |
| **2065** | 1.1 | 1.1 | 0 | 0% |
| **2066** | 1.1 | 1.1 | 0 | 0% |
| **2068** | 1.1 | 1.1 | 0 | 0% |
| **2101** | 1.2 | 1.2 | 0 | 0% |
| **2106** | 1.1 | 1.1 | 0 | 0% |
| **2107** | 1.0 | 1.0 | 0 | 0% |
| **2151** | 1.1 | 1.1 | 0 | 0% |
| **2203** | 1.1 | 1.1 | 0 | 0% |
| **2251** | 1.0 | 1.0 | 0 | 0% |
| **2255** | 1.1 | 1.1 | 0 | 0% |
| **2257** | 1.1 | 1.1 | 0 | 0% |
| **2258** | 1.1 | 1.1 | 0 | 0% |
| **2260** | 1.1 | 1.1 | 0 | 0% |
| **2264** | 1.1 | 1.1 | 0 | 0% |
| **2267** | 1.1 | 1.1 | 0 | 0% |
| **2268** | 1.1 | 1.1 | 0 | 0% |
| **2269** | 1.1 | 1.1 | 0 | 0% |
| **2302** | 1.2 | 1.2 | 0 | 0% |
| **2304** | 1.0 | 1.1 | 0.1 | 10% |
| **2306** | 1.1 | 1.1 | 0 | 0% |
| **2310** | 1.2 | 1.2 | 0 | 0% |
| **2311** | 1.1 | 1.1 | 0 | 0% |
| **2313** | 1.1 | 1.1 | 0 | 0% |
| **2315** | 1.1 | 1.1 | 0 | 0% |
| **2404** | 1.1 | 1.1 | 0 | 0% |
| **2407** | 1.2 | 1.2 | 0 | 0% |
| **2410** | 1.0 | 1.0 | 0 | 0% |
| **2414** | 1.1 | 1.1 | 0 | 0% |
| **2452** | 1.1 | 1.1 | 0 | 0% |
| **2454** | 1.1 | 1.1 | 0 | 0% |
| **2456** | 1.0 | 1.0 | 0 | 0% |
| **2457** | 1.1 | 1.1 | 0 | 0% |
| **2554** | 1.2 | 1.2 | 0 | 0% |
| **2555** | 1.1 | 1.1 | 0 | 0% |
| **2557** | 1.1 | 1.1 | 0 | 0% |
| **2601** | 1.1 | 1.1 | 0 | 0% |
| **2602** | 1.1 | 1.1 | 0 | 0% |
| **2603** | 1.2 | 1.2 | 0 | 0% |
| **2703** | 1.1 | 1.1 | 0 | 0% |
| **2704** | 1.1 | 1.1 | 0 | 0% |
| **2706** | 1.1 | 1.1 | 0 | 0% |
| **2708** | 1.2 | 1.2 | 0 | 0% |
| **2710** | 1.1 | 1.1 | 0 | 0% |

Most patients showed the same SUV in the spinalis thoracis region in the pre- and post-WoO scan. The last two columns represent the SUV variation in that region, either in absolute SUV units or in percentage, respectively. The variable "variation" had an average of 0.9%, and a standard deviation of 5.5%. The average plus and minus 2 standard deviations has a probability of 95% of "framing" the variation ranges in SUV that could be considered "noise", or inherent variability of the technique (from -10.1% to +11.9%). Because of that interval, we considered that a "TMR decrease" of 10% (-10% variation) along the WoO could be considered clinically significant (instead of 10.1%, for round-up purposes).

Of note, the number of patient IDs depicted here (n=49) is not exactly the same as that shown in the CONSORT diagram, since the CONSORT diagram shows the patients that had 2 PET scans and pCR data. This table gathers all the patients that underwent two valid scans, regardless of being evaluable for response.
